# Supplementary material for: Proteasome inhibition and cytostatic effects on human cancer cells by pyrazolone-enamines: a combined crystallographic, structural and computational study
Source: Royal Society of Chemistry journal article supplement (doi:10.1039/c4nj01906g), 2015-01-01
Supplement: c4nj01906g1.pdf [file c4nj01906g1.pdf]

## Electronic Supplementary Information

**Proteasome inhibition and cytostatic effects to human cancer cells by  
pyrazolone-enamines: a combined crystallographic, structural and  
computational study**

Xingchen Yan,<sup>a,b</sup> Jiakun Xu,<sup>c,a</sup> Xiaojing Wu,<sup>a</sup> Zhongyu Zhang,<sup>a</sup> Xia Zhang,<sup>a</sup> Yuhua  
Fan\*<sup>a</sup> and Caifeng Bi\*<sup>a</sup>

<sup>a</sup> *Key Laboratory of Marine Chemistry Theory and Technology, Ministry of Education, College of Chemistry and Chemical Engineering, Ocean University of China, Qingdao, Shandong 266100, P. R. China. Tel: 86 0532 66781932; E-mail: fanyuhua301@163.com (Y. Fan), bicai Feng301@163.com (C. Bi)*

<sup>b</sup> *Qingdao Institute of Bioenergy and Bioprocess Technology, Chinese Academy of Sciences, Qingdao, 266101, P. R. China*

<sup>c</sup> *Key Laboratory of Sustainable Development of Marine Fisheries, Ministry of Agriculture, Yellow Sea Fisheries Research Institute, Chinese Academy of Fishery Sciences, Qingdao, 266071, P. R. China*

## Characterization of the position of the hydrogen atom

In the crystal structures, the hydrogen atoms involved in tautomeric reactions were found in the final difference Fourier map and participated in the refinement, which confirms the establishment of the keto-enamine forms in the solid state. Then the  $^1\text{H}$  NMR spectra were recorded in  $[\text{D}_6]\text{DMSO}$  to confirm the positions of the hydrogen atoms in solution. As the nine compounds are very similar, compounds **1** and **6** were selected to make the detailed discussions. For compound **1**, the chemical shift at 13.34 ppm is assigned to the resonance of the hydrogen in carboxyl. The chemical shift at 12.77 ppm is assigned to the resonance of H1, which confirms the existence of the keto-enamine forms in DMSO solution. The signals in the range of 8.17 ~ 7.18 ppm are assigned to the resonance of the hydrogen in phenyl rings. The signal at 1.48 ppm is ascribed to the resonance of the hydrogen in methyl. For compound **6**, the chemical shift at 12.67 ppm is assigned to the resonance of H3, which also confirms the existence of the keto-enamine forms in DMSO solution. The chemical shift at 9.52 ppm is assigned to the resonance of the hydrogen in hydroxyl. The signals in the range of 8.01 ~ 6.24 ppm are assigned to the resonance of the hydrogen in phenyl rings. The signal at 2.00 ppm is ascribed to the resonance of the hydrogen in the methyl connected with the phenyl ring. The signal at 1.44 ppm is attributed to the resonance of the hydrogen the methyl connected with the pyrazolone ring.

**Table S1.** Crystallographic data and structure refinement for compounds **1** ~ **6**

| Compound                                                                                                       | <b>1</b>                                                          | <b>2</b>                                                          | <b>3</b>                                                          |
|----------------------------------------------------------------------------------------------------------------|-------------------------------------------------------------------|-------------------------------------------------------------------|-------------------------------------------------------------------|
| Empirical formula                                                                                              | C <sub>27</sub> H <sub>25</sub> N <sub>3</sub> O <sub>6</sub>     | C <sub>32</sub> H <sub>34</sub> N <sub>4</sub> O <sub>3</sub>     | C <sub>26</sub> H <sub>25</sub> N <sub>3</sub> O <sub>4</sub>     |
| Formula weight                                                                                                 | 487.50                                                            | 522.63                                                            | 443.49                                                            |
| Temperature (K)                                                                                                | 298(2)                                                            | 298(2)                                                            | 298(2)                                                            |
| Wavelength (Å)                                                                                                 | 0.71073                                                           | 0.71073                                                           | 0.71073                                                           |
| Crystal system                                                                                                 | Triclinic                                                         | Triclinic                                                         | Triclinic                                                         |
| Space group                                                                                                    | <i>P</i> <sup>-1</sup>                                            | <i>P</i> <sup>-1</sup>                                            | <i>P</i> <sup>-1</sup>                                            |
| <i>a</i> (Å)                                                                                                   | 8.4482(7)                                                         | 9.5274(8)                                                         | 10.1589(11)                                                       |
| <i>b</i> (Å)                                                                                                   | 10.4238(11)                                                       | 10.4205(9)                                                        | 11.3338(12)                                                       |
| <i>c</i> (Å)                                                                                                   | 13.9303(12)                                                       | 14.7518(13)                                                       | 11.6688(14)                                                       |
| $\alpha$ (°)                                                                                                   | 86.458(2)                                                         | 77.2540(10)                                                       | 68.3220(10)                                                       |
| $\beta$ (°)                                                                                                    | 77.2390(10)                                                       | 82.0960(10)                                                       | 67.3960(10)                                                       |
| $\gamma$ (°)                                                                                                   | 86.317(2)                                                         | 84.377(2)                                                         | 82.841(2)                                                         |
| Volume (Å <sup>3</sup> )                                                                                       | 1192.54(19)                                                       | 1411.4(2)                                                         | 1152.4(2)                                                         |
| <i>Z</i>                                                                                                       | 2                                                                 | 2                                                                 | 2                                                                 |
| Calculated density (g/cm <sup>3</sup> )                                                                        | 1.358                                                             | 1.227                                                             | 1.278                                                             |
| Absorption coefficient (mm <sup>-1</sup> )                                                                     | 0.097                                                             | 0.080                                                             | 0.087                                                             |
| <i>F</i> (000)                                                                                                 | 512                                                               | 556                                                               | 468                                                               |
| Crystal size (mm)                                                                                              | 0.42 × 0.30 × 0.27                                                | 0.42 × 0.37 × 0.18                                                | 0.43 × 0.38 × 0.23                                                |
| $\theta$ range for data collection (°)                                                                         | 3.00 to 25.02                                                     | 2.44 to 25.02                                                     | 2.60 to 25.02                                                     |
| Limiting indices                                                                                               | -10 ≤ <i>h</i> ≤ 9<br>-12 ≤ <i>k</i> ≤ 9<br>-16 ≤ <i>l</i> ≤ 16   | -11 ≤ <i>h</i> ≤ 11<br>-8 ≤ <i>k</i> ≤ 12<br>-16 ≤ <i>l</i> ≤ 17  | -12 ≤ <i>h</i> ≤ 11<br>-13 ≤ <i>k</i> ≤ 13<br>-13 ≤ <i>l</i> ≤ 13 |
| Reflections collected / unique                                                                                 | 6035 / 4140<br>[ <i>R</i> <sub>int</sub> = 0.0413]                | 7082 / 4894<br>[ <i>R</i> <sub>int</sub> = 0.0636]                | 6007 / 4003<br>[ <i>R</i> <sub>int</sub> = 0.0284]                |
| Completeness to $\theta = 25.02$                                                                               | 0.982                                                             | 0.980                                                             | 0.982                                                             |
| Max. and min. transmission                                                                                     | 0.9742 and 0.9603                                                 | 0.9857 and 0.9672                                                 | 0.9802 and 0.9634                                                 |
| Data / restraints / parameters                                                                                 | 4140 / 0 / 327                                                    | 4894 / 0 / 355                                                    | 4003 / 0 / 298                                                    |
| Goodness of fit on <i>F</i> <sup>2</sup>                                                                       | 0.995                                                             | 1.010                                                             | 0.973                                                             |
| <i>R</i> <sub>1</sub> <sup>a</sup> , <i>wR</i> <sub>2</sub> <sup>b</sup> [ <i>I</i> > 2 $\sigma$ ( <i>I</i> )] | <i>R</i> <sub>1</sub> = 0.0640<br><i>wR</i> <sub>2</sub> = 0.1427 | <i>R</i> <sub>1</sub> = 0.0729<br><i>wR</i> <sub>2</sub> = 0.1616 | <i>R</i> <sub>1</sub> = 0.0513<br><i>wR</i> <sub>2</sub> = 0.1346 |
| <i>R</i> <sub>1</sub> <sup>a</sup> , <i>wR</i> <sub>2</sub> <sup>b</sup> (all data)                            | <i>R</i> <sub>1</sub> = 0.1562<br><i>wR</i> <sub>2</sub> = 0.1892 | <i>R</i> <sub>1</sub> = 0.2033<br><i>wR</i> <sub>2</sub> = 0.2464 | <i>R</i> <sub>1</sub> = 0.0931<br><i>wR</i> <sub>2</sub> = 0.1720 |
| Largest diff. peak and hole (e. Å <sup>3</sup> )                                                               | 0.329 and -0.279                                                  | 0.347 and -0.236                                                  | 0.499 and -0.263                                                  |
| Compound                                                                                                       | <b>4</b>                                                          | <b>5</b>                                                          | <b>6</b>                                                          |
| Empirical formula                                                                                              | C <sub>25</sub> H <sub>24</sub> N <sub>4</sub> O <sub>3</sub>     | C <sub>24</sub> H <sub>21</sub> N <sub>3</sub> O <sub>2</sub>     | C <sub>24</sub> H <sub>21</sub> N <sub>3</sub> O <sub>2</sub>     |
| Formula weight                                                                                                 | 428.48                                                            | 383.44                                                            | 383.44                                                            |
| Temperature (K)                                                                                                | 298(2)                                                            | 298(2)                                                            | 298(2)                                                            |
| Wavelength (Å)                                                                                                 | 0.71073                                                           | 0.71073                                                           | 0.71073                                                           |
| Crystal system                                                                                                 | Triclinic                                                         | Triclinic                                                         | Triclinic                                                         |
| Space group                                                                                                    | <i>P</i> <sup>-1</sup>                                            | <i>P</i> <sup>-1</sup>                                            | <i>P</i> <sup>-1</sup>                                            |

|                                                     |                                                  |                                                  |                                                  |
|-----------------------------------------------------|--------------------------------------------------|--------------------------------------------------|--------------------------------------------------|
| $a$ (Å)                                             | 7.3752(6)                                        | 7.7356(7)                                        | 7.2287(6)                                        |
| $b$ (Å)                                             | 10.9275(9)                                       | 10.8256(8)                                       | 11.0934(9)                                       |
| $c$ (Å)                                             | 14.5614(12)                                      | 13.5508(11)                                      | 14.0509(14)                                      |
| $\alpha$ (°)                                        | 101.707(2)                                       | 112.683(2)                                       | 107.981(2)                                       |
| $\beta$ (°)                                         | 92.7690(10)                                      | 90.9070(10)                                      | 99.5340(10)                                      |
| $\gamma$ (°)                                        | 98.5440(10)                                      | 107.7410(10)                                     | 105.1460(10)                                     |
| Volume (Å <sup>3</sup> )                            | 1132.64(16)                                      | 985.67(14)                                       | 996.58(15)                                       |
| $Z$                                                 | 2                                                | 2                                                | 2                                                |
| Calculated density (g/cm <sup>3</sup> )             | 1.253                                            | 1.292                                            | 1.278                                            |
| Absorption coefficient<br>(mm <sup>-1</sup> )       | 0.084                                            | 0.088                                            | 0.083                                            |
| $F(000)$                                            | 452                                              | 404                                              | 404                                              |
| Crystal size (mm)                                   | 0.42 × 0.40 × 0.23                               | 0.46 × 0.44 × 0.35                               | 0.50 × 0.48 × 0.40                               |
| $\theta$ range for data collection (°)              | 2.64 to 25.02                                    | 2.80 to 25.02                                    | 3.02 to 25.02                                    |
| Limiting indices                                    | -8 ≤ $h$ ≤ 8<br>-12 ≤ $k$ ≤ 12<br>-17 ≤ $l$ ≤ 12 | -9 ≤ $h$ ≤ 9<br>-12 ≤ $k$ ≤ 12<br>-16 ≤ $l$ ≤ 11 | -8 ≤ $h$ ≤ 8<br>-13 ≤ $k$ ≤ 12<br>-16 ≤ $l$ ≤ 11 |
| Reflections collected /<br>unique                   | 5528 / 3936<br>[ $R_{\text{int}} = 0.0437$ ]     | 4952 / 3429<br>[ $R_{\text{int}} = 0.0237$ ]     | 4993 / 3457<br>[ $R_{\text{int}} = 0.0255$ ]     |
| Completeness to $\theta = 25.02$                    | 0.983                                            | 0.984                                            | 0.982                                            |
| Max. and min. transmission                          | 0.9809 and 0.9654                                | 0.9699 and 0.9607                                | 0.9676 and 0.9597                                |
| Data / restraints / parameters                      | 3936 / 0 / 291                                   | 3429 / 0 / 264                                   | 3457 / 0 / 263                                   |
| Goodness of fit on $F^2$                            | 1.025                                            | 1.044                                            | 0.971                                            |
| $R_1^a$ , $wR_2^b$ [ $I > 2\sigma(I)$ ]             | $R_1 = 0.0721$<br>$wR_2 = 0.1896$                | $R_1 = 0.0446$<br>$wR_2 = 0.1076$                | $R_1 = 0.0427$<br>$wR_2 = 0.1076$                |
| $R_1^a$ , $wR_2^b$ (all data)                       | $R_1 = 0.1387$<br>$wR_2 = 0.2453$                | $R_1 = 0.0735$<br>$wR_2 = 0.1320$                | $R_1 = 0.0627$<br>$wR_2 = 0.1258$                |
| Largest diff. peak and hole<br>(e. Å <sup>3</sup> ) | 0.484 and -0.298                                 | 0.536 and -0.481                                 | 0.206 and -0.192                                 |

$$^a R = \Sigma(|F_0| - |F_C|) / \Sigma|F_0|$$

$$^b wR = [\Sigma w(|F_0|^2 - |F_C|^2)^2 / \Sigma w(F_0^2)]^{1/2}.$$

**Table S2.** Selected bond lengths and angles for compound **1** (Å, °)

| Bond       | Dist.    | Bond        | Dist.    |
|------------|----------|-------------|----------|
| N1–C9      | 1.334(4) | C7–C8       | 1.383(5) |
| N1–C7      | 1.416(5) | C9–C17      | 1.384(5) |
| N2–C16     | 1.365(4) | C9–C10      | 1.482(5) |
| N2–N3      | 1.396(4) | C10–C15     | 1.374(6) |
| N2–C20     | 1.417(4) | C10–C11     | 1.383(5) |
| N3–C18     | 1.305(4) | C11–C12     | 1.374(5) |
| O1–C1      | 1.200(5) | C12–C13     | 1.374(6) |
| O2–C1      | 1.306(5) | C13–C14     | 1.362(6) |
| O3–C2      | 1.323(4) | C14–C15     | 1.372(5) |
| O4–C2      | 1.186(4) | C16–C17     | 1.442(5) |
| O5–C16     | 1.245(4) | C17–C18     | 1.434(5) |
| O6–C26     | 1.407(7) | C18–C19     | 1.490(5) |
| C1–C3      | 1.479(5) | C20–C25     | 1.372(5) |
| C2–C5      | 1.490(5) | C20–C21     | 1.378(5) |
| C3–C4      | 1.378(5) | C21–C22     | 1.375(5) |
| C3–C8      | 1.381(5) | C22–C23     | 1.369(6) |
| C4–C5      | 1.387(5) | C23–C24     | 1.372(6) |
| C5–C6      | 1.383(5) | C24–C25     | 1.387(5) |
| C6–C7      | 1.376(5) | C26–C27     | 1.396(8) |
| Bond       | Angle    | Bond        | Angle    |
| C9–N1–C7   | 132.3(3) | C15–C10–C11 | 119.4(4) |
| C16–N2–N3  | 111.8(3) | C15–C10–C9  | 119.8(4) |
| C16–N2–C20 | 127.4(3) | C11–C10–C9  | 120.7(4) |
| N3–N2–C20  | 119.6(3) | C12–C11–C10 | 119.7(4) |
| C18–N3–N2  | 106.6(3) | C13–C12–C11 | 120.0(4) |
| O1–C1–O2   | 122.5(4) | C14–C13–C12 | 120.7(4) |
| O1–C1–C3   | 123.2(4) | C13–C14–C15 | 119.5(5) |
| O2–C1–C3   | 114.2(4) | C14–C15–C10 | 120.8(4) |
| O4–C2–O3   | 124.1(4) | O5–C16–N2   | 126.5(3) |
| O4–C2–C5   | 125.1(4) | O5–C16–C17  | 128.1(3) |
| O3–C2–C5   | 110.8(3) | N2–C16–C17  | 105.4(3) |
| C4–C3–C8   | 120.7(4) | C9–C17–C18  | 133.2(3) |
| C4–C3–C1   | 121.9(4) | C9–C17–C16  | 122.2(3) |
| C8–C3–C1   | 117.4(4) | C18–C17–C16 | 104.6(3) |
| C3–C4–C5   | 119.4(4) | N3–C18–C17  | 111.7(3) |
| C6–C5–C4   | 119.5(4) | N3–C18–C19  | 119.6(3) |
| C6–C5–C2   | 120.0(3) | C17–C18–C19 | 128.8(4) |
| C4–C5–C2   | 120.5(4) | C25–C20–C21 | 119.8(4) |
| C7–C6–C5   | 121.3(3) | C25–C20–N2  | 120.2(4) |
| C6–C7–C8   | 118.9(4) | C21–C20–N2  | 120.0(4) |
| C6–C7–N1   | 116.6(3) | C22–C21–C20 | 119.4(4) |
| C8–C7–N1   | 124.4(3) | C23–C22–C21 | 121.3(4) |

|            |          |             |          |
|------------|----------|-------------|----------|
| C3-C8-C7   | 120.2(4) | C22-C23-C24 | 119.4(4) |
| N1-C9-C17  | 117.8(3) | C23-C24-C25 | 119.9(4) |
| N1-C9-C10  | 119.6(3) | C20-C25-C24 | 120.2(4) |
| C17-C9-C10 | 122.6(3) | C27-C26-O6  | 114.9(6) |

---

**Table S3.** Selected bond lengths and angles for compound **2** (Å, °)

| Bond    | Dist.    | Bond    | Dist.    |
|---------|----------|---------|----------|
| N1–C3   | 1.361(6) | C12–C17 | 1.383(6) |
| N1–N2   | 1.395(5) | C12–C13 | 1.391(6) |
| N1–C4   | 1.412(6) | C13–C14 | 1.362(7) |
| N2–C1   | 1.308(6) | C14–C15 | 1.373(8) |
| N3–C11  | 1.344(6) | C15–C16 | 1.365(8) |
| N3–C18  | 1.412(6) | C16–C17 | 1.371(7) |
| N4–C28  | 1.375(7) | C18–C19 | 1.363(7) |
| O1–C3   | 1.249(5) | C18–C23 | 1.378(6) |
| O2–C31  | 1.315(8) | C19–C20 | 1.380(7) |
| O3–C32  | 1.395(8) | C20–C21 | 1.384(6) |
| C1–C2   | 1.431(6) | C21–C22 | 1.367(7) |
| C1–C10  | 1.500(6) | C21–C24 | 1.506(7) |
| C2–C11  | 1.377(7) | C22–C23 | 1.377(7) |
| C2–C3   | 1.436(6) | C24–C25 | 1.507(7) |
| C4–C5   | 1.359(6) | C25–C30 | 1.356(7) |
| C4–C9   | 1.387(6) | C25–C26 | 1.378(7) |
| C5–C6   | 1.373(7) | C26–C27 | 1.382(7) |
| C6–C7   | 1.388(7) | C27–C28 | 1.367(8) |
| C7–C8   | 1.350(8) | C28–C29 | 1.368(8) |
| C8–C9   | 1.360(7) | C29–C30 | 1.386(8) |
| C11–C12 | 1.460(6) |         |          |

  

| Bond       | Angle    | Bond        | Angle    |
|------------|----------|-------------|----------|
| C3–N1–N2   | 111.2(4) | C13–C12–C11 | 119.1(5) |
| C3–N1–C4   | 129.9(4) | C14–C13–C12 | 120.0(5) |
| N2–N1–C4   | 118.9(4) | C13–C14–C15 | 120.3(5) |
| C1–N2–N1   | 106.9(4) | C16–C15–C14 | 120.0(6) |
| C11–N3–C18 | 131.1(5) | C15–C16–C17 | 120.6(6) |
| N2–C1–C2   | 111.3(4) | C16–C17–C12 | 119.6(5) |
| N2–C1–C10  | 118.4(4) | C19–C18–C23 | 118.8(5) |
| C2–C1–C10  | 130.3(5) | C19–C18–N3  | 124.8(4) |
| C11–C2–C1  | 131.8(5) | C23–C18–N3  | 116.3(5) |
| C11–C2–C3  | 123.5(4) | C18–C19–C20 | 120.6(5) |
| C1–C2–C3   | 104.5(5) | C19–C20–C21 | 121.4(5) |
| O1–C3–N1   | 125.9(5) | C22–C21–C20 | 117.0(5) |
| O1–C3–C2   | 128.2(5) | C22–C21–C24 | 122.5(5) |
| N1–C3–C2   | 105.9(4) | C20–C21–C24 | 120.5(6) |
| C5–C4–C9   | 120.1(5) | C21–C22–C23 | 122.2(5) |
| C5–C4–N1   | 120.7(4) | C22–C23–C18 | 120.0(5) |
| C9–C4–N1   | 119.3(5) | C21–C24–C25 | 113.8(4) |
| C4–C5–C6   | 120.0(5) | C30–C25–C26 | 117.8(6) |
| C5–C6–C7   | 120.0(6) | C30–C25–C24 | 121.6(6) |
| C8–C7–C6   | 118.9(6) | C26–C25–C24 | 120.5(6) |

|             |          |             |          |
|-------------|----------|-------------|----------|
| C7-C8-C9    | 121.9(5) | C25-C26-C27 | 121.3(6) |
| C8-C9-C4    | 119.1(5) | C28-C27-C26 | 120.9(6) |
| N3-C11-C2   | 116.9(5) | C27-C28-C29 | 117.3(6) |
| N3-C11-C12  | 120.7(5) | C27-C28-N4  | 120.5(6) |
| C2-C11-C12  | 122.3(4) | C29-C28-N4  | 122.2(7) |
| C17-C12-C13 | 119.4(5) | C28-C29-C30 | 121.9(6) |
| C17-C12-C11 | 121.5(4) | C25-C30-C29 | 120.7(6) |

---



**Table S4.** Selected bond lengths and angles for compound **3** (Å, °)

| Bond   | Dist.    | Bond    | Dist.    |
|--------|----------|---------|----------|
| N1–C19 | 1.331(3) | C9–C10  | 1.429(3) |
| N1–C6  | 1.424(3) | C9–C18  | 1.495(4) |
| N2–C11 | 1.368(3) | C10–C19 | 1.396(3) |
| N2–N3  | 1.396(3) | C10–C11 | 1.437(3) |
| N2–C12 | 1.414(3) | C12–C17 | 1.366(4) |
| N3–C9  | 1.308(3) | C12–C13 | 1.383(4) |
| O1–C1  | 1.305(3) | C13–C14 | 1.373(4) |
| O2–C1  | 1.191(4) | C14–C15 | 1.372(5) |
| O3–C11 | 1.251(3) | C15–C16 | 1.350(5) |
| O4–C26 | 1.419(4) | C16–C17 | 1.379(4) |
| C1–C2  | 1.496(4) | C19–C20 | 1.475(3) |
| C2–C3  | 1.510(4) | C20–C25 | 1.384(4) |
| C3–C8  | 1.369(4) | C20–C21 | 1.388(4) |
| C3–C4  | 1.384(4) | C21–C22 | 1.379(4) |
| C4–C5  | 1.378(4) | C22–C23 | 1.370(5) |
| C5–C6  | 1.373(4) | C23–C24 | 1.365(5) |
| C6–C7  | 1.374(4) | C24–C25 | 1.372(4) |
| C7–C8  | 1.382(4) |         |          |

  

| Bond       | Angle      | Bond        | Angle    |
|------------|------------|-------------|----------|
| C19–N1–C6  | 129.0(2)   | C9–C10–C11  | 104.8(2) |
| C11–N2–N3  | 110.52(19) | O3–C11–N2   | 125.4(2) |
| C11–N2–C12 | 128.6(2)   | O3–C11–C10  | 128.6(2) |
| N3–N2–C12  | 120.6(2)   | N2–C11–C10  | 106.0(2) |
| C9–N3–N2   | 107.5(2)   | C17–C12–C13 | 119.3(3) |
| O2–C1–O1   | 122.1(3)   | C17–C12–N2  | 121.0(2) |
| O2–C1–C2   | 125.6(3)   | C13–C12–N2  | 119.6(2) |
| O1–C1–C2   | 112.2(3)   | C14–C13–C12 | 119.3(3) |
| C1–C2–C3   | 114.0(2)   | C15–C14–C13 | 121.3(3) |
| C8–C3–C4   | 118.1(2)   | C16–C15–C14 | 118.7(3) |
| C8–C3–C2   | 121.4(3)   | C15–C16–C17 | 121.2(3) |
| C4–C3–C2   | 120.5(3)   | C12–C17–C16 | 120.1(3) |
| C5–C4–C3   | 121.1(3)   | N1–C19–C10  | 117.2(2) |
| C6–C5–C4   | 119.9(3)   | N1–C19–C20  | 118.5(2) |
| C5–C6–C7   | 119.7(2)   | C10–C19–C20 | 124.3(2) |
| C5–C6–N1   | 122.1(2)   | C25–C20–C21 | 119.1(2) |
| C7–C6–N1   | 118.0(2)   | C25–C20–C19 | 121.3(2) |
| C6–C7–C8   | 119.7(3)   | C21–C20–C19 | 119.5(2) |
| C3–C8–C7   | 121.4(3)   | C22–C21–C20 | 119.8(3) |
| N3–C9–C10  | 111.0(2)   | C23–C22–C21 | 120.2(3) |
| N3–C9–C18  | 118.8(2)   | C24–C23–C22 | 120.3(3) |
| C10–C9–C18 | 130.2(2)   | C23–C24–C25 | 120.2(3) |
| C19–C10–C9 | 133.4(2)   | C24–C25–C20 | 120.3(3) |



**Table S5.** Selected bond lengths and angles for compound **4** (Å, °)

| Bond       | Dist.    | Bond        | Dist.    |
|------------|----------|-------------|----------|
| N1–C3      | 1.383(5) | C7–C8       | 1.386(6) |
| N1–N2      | 1.406(4) | C8–C9       | 1.368(6) |
| N1–C5      | 1.426(5) | C9–C10      | 1.384(6) |
| N2–C1      | 1.309(5) | C11–C12     | 1.479(5) |
| N3–C11     | 1.340(5) | C12–C13     | 1.389(6) |
| N3–C22     | 1.435(5) | C12–C17     | 1.391(5) |
| N4–C18     | 1.327(5) | C13–C14     | 1.385(6) |
| O1–C3      | 1.253(4) | C14–C15     | 1.369(7) |
| O2–C18     | 1.244(4) | C15–C16     | 1.371(7) |
| O3–C25     | 1.401(6) | C16–C17     | 1.372(6) |
| C1–C2      | 1.445(5) | C18–C19     | 1.498(5) |
| C1–C4      | 1.492(5) | C19–C24     | 1.380(5) |
| C2–C11     | 1.410(5) | C19–C20     | 1.400(5) |
| C2–C3      | 1.439(5) | C20–C21     | 1.387(5) |
| C5–C6      | 1.380(6) | C21–C22     | 1.378(5) |
| C5–C10     | 1.387(6) | C22–C23     | 1.388(6) |
| C6–C7      | 1.388(6) | C23–C24     | 1.387(5) |
| Bond       | Angle    | Bond        | Angle    |
| C3–N1–N2   | 112.1(3) | N3–C11–C12  | 120.4(3) |
| C3–N1–C5   | 129.0(3) | C2–C11–C12  | 122.5(3) |
| N2–N1–C5   | 118.8(3) | C13–C12–C17 | 119.3(4) |
| C1–N2–N1   | 106.8(3) | C13–C12–C11 | 121.4(4) |
| C11–N3–C22 | 130.5(4) | C17–C12–C11 | 119.3(4) |
| N2–C1–C2   | 110.8(3) | C12–C13–C14 | 120.2(4) |
| N2–C1–C4   | 118.5(3) | C15–C14–C13 | 119.7(5) |
| C2–C1–C4   | 130.7(4) | C14–C15–C16 | 120.3(5) |
| C11–C2–C3  | 122.1(3) | C15–C16–C17 | 121.0(5) |
| C11–C2–C1  | 131.7(3) | C16–C17–C12 | 119.5(4) |
| C3–C2–C1   | 106.0(3) | O2–C18–N4   | 123.0(4) |
| O1–C3–N1   | 125.3(4) | O2–C18–C19  | 119.3(3) |
| O1–C3–C2   | 130.4(3) | N4–C18–C19  | 117.7(4) |
| N1–C3–C2   | 104.3(3) | C24–C19–C20 | 119.0(3) |
| C6–C5–C10  | 120.1(4) | C24–C19–C18 | 118.6(3) |
| C6–C5–N1   | 120.5(4) | C20–C19–C18 | 122.4(3) |
| C10–C5–N1  | 119.3(4) | C21–C20–C19 | 120.0(4) |
| C5–C6–C7   | 120.0(4) | C22–C21–C20 | 120.4(4) |
| C6–C7–C8   | 120.0(4) | C21–C22–C23 | 119.9(3) |
| C9–C8–C7   | 119.3(4) | C21–C22–N3  | 116.5(4) |
| C8–C9–C10  | 121.5(5) | C23–C22–N3  | 123.5(4) |
| C9–C10–C5  | 119.0(4) | C24–C23–C22 | 119.7(4) |
| N3–C11–C2  | 116.9(3) | C19–C24–C23 | 120.9(4) |

**Table S6.** Selected bond lengths and angles for compound **5** (Å, °)

| Bond        | Dist.      | Bond        | Dist.      |
|-------------|------------|-------------|------------|
| N1–C1       | 1.368(3)   | C6–C7       | 1.387(3)   |
| N1–N2       | 1.399(2)   | C7–C8       | 1.377(4)   |
| N1–C5       | 1.417(2)   | C8–C9       | 1.365(4)   |
| N2–C3       | 1.314(3)   | C9–C10      | 1.373(3)   |
| C18–C23     | 1.383(3)   | C11–C12     | 1.489(3)   |
| C18–C19     | 1.392(3)   | C12–C13     | 1.385(3)   |
| C18–N3      | 1.423(3)   | C12–C17     | 1.388(3)   |
| O1–C1       | 1.259(2)   | C13–C14     | 1.381(3)   |
| N3–C11      | 1.334(3)   | C14–C15     | 1.373(4)   |
| O2–C19      | 1.357(2)   | C15–C16     | 1.370(4)   |
| C1–C2       | 1.434(3)   | C16–C17     | 1.377(3)   |
| C2–C11      | 1.395(3)   | C19–C20     | 1.379(3)   |
| C2–C3       | 1.437(3)   | C20–C21     | 1.373(3)   |
| C3–C4       | 1.490(3)   | C21–C22     | 1.387(3)   |
| C5–C6       | 1.374(3)   | C22–C23     | 1.382(3)   |
| C5–C10      | 1.379(3)   | C22–C24     | 1.506(3)   |
| Bond        | Angle      | Bond        | Angle      |
| C1–N1–N2    | 112.46(16) | C8–C9–C10   | 120.6(2)   |
| C1–N1–C5    | 127.18(17) | C9–C10–C5   | 119.7(2)   |
| N2–N1–C5    | 120.03(17) | N3–C11–C2   | 118.29(18) |
| C3–N2–N1    | 105.74(17) | N3–C11–C12  | 118.55(18) |
| C23–C18–C19 | 120.00(19) | C2–C11–C12  | 123.11(19) |
| C23–C18–N3  | 124.65(19) | C13–C12–C17 | 119.8(2)   |
| C19–C18–N3  | 115.32(18) | C13–C12–C11 | 121.03(18) |
| C11–N3–C18  | 131.09(17) | C17–C12–C11 | 119.20(19) |
| O1–C1–N1    | 125.27(18) | C14–C13–C12 | 119.5(2)   |
| O1–C1–C2    | 129.74(19) | C15–C14–C13 | 120.6(2)   |
| N1–C1–C2    | 104.96(17) | C16–C15–C14 | 119.8(2)   |
| C11–C2–C1   | 122.73(19) | C15–C16–C17 | 120.6(2)   |
| C11–C2–C3   | 131.56(18) | C16–C17–C12 | 119.7(2)   |
| C1–C2–C3    | 105.04(17) | O2–C19–C20  | 124.8(2)   |
| N2–C3–C2    | 111.64(18) | O2–C19–C18  | 116.22(19) |
| N2–C3–C4    | 118.45(19) | C20–C19–C18 | 119.0(2)   |
| C2–C3–C4    | 129.88(19) | C21–C20–C19 | 120.5(2)   |
| C6–C5–C10   | 120.4(2)   | C20–C21–C22 | 121.4(2)   |
| C6–C5–N1    | 120.40(19) | C23–C22–C21 | 118.1(2)   |
| C10–C5–N1   | 119.15(19) | C23–C22–C24 | 121.2(2)   |
| C5–C6–C7    | 119.2(2)   | C21–C22–C24 | 120.8(2)   |
| C8–C7–C6    | 120.2(2)   | C22–C23–C18 | 121.1(2)   |
| C9–C8–C7    | 119.9(2)   |             |            |

**Table S7.** Selected bond lengths and angles for compound **6** (Å, °)

| Bond      | Dist.      | Bond        | Dist.      |
|-----------|------------|-------------|------------|
| N1–C1     | 1.367(2)   | C8–C9       | 1.376(4)   |
| N1–N2     | 1.400(2)   | C9–C10      | 1.372(3)   |
| N1–C19    | 1.419(2)   | C10–C11     | 1.378(3)   |
| N2–C3     | 1.308(2)   | C12–C17     | 1.382(3)   |
| N3–C5     | 1.328(2)   | C12–C13     | 1.384(3)   |
| N3–C12    | 1.426(2)   | C13–C14     | 1.382(2)   |
| O1–C1     | 1.261(2)   | C14–C15     | 1.391(3)   |
| O2–C14    | 1.354(2)   | C15–C16     | 1.376(3)   |
| C1–C2     | 1.435(2)   | C15–C18     | 1.511(3)   |
| C2–C5     | 1.400(2)   | C16–C17     | 1.381(3)   |
| C2–C3     | 1.439(3)   | C19–C20     | 1.371(3)   |
| C3–C4     | 1.487(3)   | C19–C24     | 1.376(3)   |
| C5–C6     | 1.487(2)   | C20–C21     | 1.380(3)   |
| C6–C7     | 1.384(3)   | C21–C22     | 1.367(3)   |
| C6–C11    | 1.385(3)   | C22–C23     | 1.373(3)   |
| C7–C8     | 1.378(3)   | C23–C24     | 1.385(3)   |
| Bond      | Angle      | Bond        | Angle      |
| C1–N1–N2  | 112.03(14) | C9–C10–C11  | 120.2(2)   |
| C1–N1–C19 | 127.40(16) | C10–C11–C6  | 119.90(19) |
| N2–N1–C19 | 119.95(14) | C17–C12–C13 | 119.93(17) |
| C3–N2–N1  | 106.46(15) | C17–C12–N3  | 122.36(17) |
| C5–N3–C12 | 129.35(15) | C13–C12–N3  | 117.67(16) |
| O1–C1–N1  | 125.60(16) | C14–C13–C12 | 120.33(16) |
| O1–C1–C2  | 129.44(16) | O2–C14–C13  | 122.83(17) |
| N1–C1–C2  | 104.92(15) | O2–C14–C15  | 116.47(16) |
| C5–C2–C1  | 121.96(17) | C13–C14–C15 | 120.68(17) |
| C5–C2–C3  | 132.47(17) | C16–C15–C14 | 117.52(17) |
| C1–C2–C3  | 105.29(15) | C16–C15–C18 | 122.42(18) |
| N2–C3–C2  | 111.08(16) | C14–C15–C18 | 120.06(19) |
| N2–C3–C4  | 118.35(17) | C15–C16–C17 | 123.00(18) |
| C2–C3–C4  | 130.52(17) | C16–C17–C12 | 118.50(18) |
| N3–C5–C2  | 118.59(16) | C20–C19–C24 | 120.41(18) |
| N3–C5–C6  | 119.05(15) | C20–C19–N1  | 119.46(17) |
| C2–C5–C6  | 122.30(17) | C24–C19–N1  | 120.12(17) |
| C7–C6–C11 | 119.68(18) | C19–C20–C21 | 120.00(19) |
| C7–C6–C5  | 119.06(17) | C22–C21–C20 | 120.1(2)   |
| C11–C6–C5 | 121.24(16) | C21–C22–C23 | 119.8(2)   |
| C8–C7–C6  | 119.9(2)   | C22–C23–C24 | 120.6(2)   |
| C9–C8–C7  | 120.1(2)   | C19–C24–C23 | 119.0(2)   |
| C10–C9–C8 | 120.2(2)   |             |            |

**Table S8.** Hydrogen bonding geometry for compound **1** (Å, °)

| <i>D</i> -H... <i>A</i>    | <i>D</i> -H | H... <i>A</i> | <i>D</i> ... <i>A</i> | <i>D</i> -H... <i>A</i> |
|----------------------------|-------------|---------------|-----------------------|-------------------------|
| N1-H1...O5                 | 0.84(4)     | 1.92(4)       | 2.649(4)              | 145(4)                  |
| O2-H2...O6 <sup>a</sup>    | 0.82        | 1.80          | 2.611(4)              | 171.4                   |
| O3-H3...N3 <sup>b</sup>    | 0.82        | 2.05          | 2.741(4)              | 141.6                   |
| O6-H6...O1                 | 0.82        | 1.92          | 2.712(5)              | 160.6                   |
| C15-H15...O5 <sup>c</sup>  | 0.93        | 2.39          | 3.296(5)              | 164.3                   |
| C19-H19A...O3 <sup>d</sup> | 0.96        | 2.40          | 3.169(5)              | 137.4                   |
| C21-H21...N3               | 0.93        | 2.50          | 2.816(5)              | 100.1                   |
| C25-H25...O5               | 0.93        | 2.36          | 2.910(5)              | 117.4                   |

Symmetry codes: (a)  $-x+2, -y+1, -z+2$ ; (b)  $x+1, y-1, z$ ; (c)  $-x+1, -y+1, -z+1$ ; (d)  $x-1, y+1, z$ .

**Table S9.** Hydrogen bonding geometry for compound **2** (Å, °)

| <i>D</i> -H... <i>A</i>  | <i>D</i> -H | H... <i>A</i> | <i>D</i> ... <i>A</i> | <i>D</i> -H... <i>A</i> |
|--------------------------|-------------|---------------|-----------------------|-------------------------|
| O2-H2...N2 <sup>a</sup>  | 0.82        | 2.07          | 2.822(6)              | 152                     |
| O3-H3...O2 <sup>b</sup>  | 0.82        | 1.88          | 2.676(7)              | 165                     |
| N3-H3A...O1              | 0.91(5)     | 1.86(5)       | 2.680(6)              | 149(4)                  |
| N4-H4A...O3 <sup>c</sup> | 0.86        | 2.30          | 3.158(8)              | 172                     |
| N4-H4B...O3 <sup>d</sup> | 0.86        | 2.25          | 3.057(8)              | 155                     |
| C9-H9...O1               | 0.93        | 2.42          | 2.957(6)              | 117                     |

Symmetry codes: (a)  $x+1, y, z$ ; (b)  $x-1, y, z+1$ ; (c)  $x, y-1, z$ ; (d)  $-x+1, -y, -z+2$ .

**Table S10.** Hydrogen bonding geometry for compound **3** (Å, °)

| <i>D</i> -H... <i>A</i>    | <i>D</i> -H | H... <i>A</i> | <i>D</i> ... <i>A</i> | <i>D</i> -H... <i>A</i> |
|----------------------------|-------------|---------------|-----------------------|-------------------------|
| O1-H1...O4 <sup>a</sup>    | 0.82        | 1.81          | 2.591(3)              | 159.3                   |
| O4-H4...N3                 | 0.82        | 2.00          | 2.810(3)              | 172.2                   |
| N1-H1A...O3                | 0.96(3)     | 1.79(3)       | 2.628(3)              | 145(2)                  |
| C7-H7...O2 <sup>b</sup>    | 0.93        | 2.59          | 3.502(4)              | 166.0                   |
| C2-H2B...O1 <sup>c</sup>   | 0.97        | 2.57          | 3.503(4)              | 162.4                   |
| C26-H26B...O3 <sup>d</sup> | 0.96        | 2.47          | 3.400(4)              | 164.6                   |

Symmetry codes:(a)  $x-1, y-1, z$ ;(b)  $-x, -y, z+2$ ;(c)  $-x, -y, -z+1$ ;(d)  $x+1, y, z$ .



**Table S11.** Hydrogen bonding geometry for compound **4** (Å, °)

| <i>D</i> -H... <i>A</i>   | <i>D</i> -H | H... <i>A</i> | <i>D</i> ... <i>A</i> | <i>D</i> -H... <i>A</i> |
|---------------------------|-------------|---------------|-----------------------|-------------------------|
| O3-H3...O1                | 0.82        | 2.13          | 2.914(5)              | 161.2                   |
| N3-H2a...O1               | 0.89(4)     | 1.95(4)       | 2.696(4)              | 141(3)                  |
| N4-H4A...O2 <sup>a</sup>  | 0.86        | 2.04          | 2.895(4)              | 171.5                   |
| N4-H4B...O3 <sup>b</sup>  | 0.86        | 2.19          | 2.943(5)              | 146.8                   |
| C7-H7...O2 <sup>c</sup>   | 0.93        | 2.49          | 3.414(6)              | 176.1                   |
| C17-H17...O2 <sup>d</sup> | 0.93        | 2.56          | 3.480(6)              | 172.0                   |

Symmetry codes: (a)  $-x+3, -y, -z$ ; (b)  $-x+2, -y+1, -z$ ; (c)  $x-1, y+1, z$ ; (d)  $x-1, y, z$ .

**Table S12.** Hydrogen bonding geometry for compound **5** (Å, °)

| <i>D</i> -H... <i>A</i> | <i>D</i> -H | H... <i>A</i> | <i>D</i> ... <i>A</i> | <i>D</i> -H... <i>A</i> |
|-------------------------|-------------|---------------|-----------------------|-------------------------|
| N3-H3...O1              | 0.94(3)     | 1.92(3)       | 2.718(2)              | 143(2)                  |
| O2-H2...O1 <sup>a</sup> | 0.82        | 1.98          | 2.762(2)              | 158.4                   |

Symmetry codes: (a)  $-x+1, -y+1, -z+1$ .

**Table S13.** Hydrogen bonding geometry for compound **6** (Å, °)

| <i>D</i> -H... <i>A</i> | <i>D</i> -H | H... <i>A</i> | <i>D</i> ... <i>A</i> | <i>D</i> -H... <i>A</i> |
|-------------------------|-------------|---------------|-----------------------|-------------------------|
| N3-H3...O1              | 0.97(2)     | 1.88(2)       | 2.696(2)              | 140.3(19)               |
| O2-H2...O1 <sup>a</sup> | 0.82        | 1.96          | 2.7485(19)            | 162.0                   |

Symmetry codes: (a)  $-x, -y, -z+1$ .

**Table S14.** The experimental bond lengths and torsion angles for tautomer **6c**, and the corresponding calculated values for tautomers **6a**, **6b** and **6c** (Å, °)

| Bond          | <b>6a</b> Calculated | <b>6b</b> Calculated | <b>6c</b> Calculated | <b>6c</b> Experimental |
|---------------|----------------------|----------------------|----------------------|------------------------|
| O1–C1         | 1.241                | 1.228                | 1.257                | 1.261(2)               |
| C1–C2         | 1.460                | 1.534                | 1.454                | 1.435(2)               |
| C2–C3         | 1.388                | 1.509                | 1.444                | 1.439(3)               |
| C2–C5         | 1.473                | 1.527                | 1.405                | 1.400(2)               |
| N1–C1         | 1.406                | 1.381                | 1.386                | 1.367(2)               |
| N1–N2         | 1.389                | 1.409                | 1.397                | 1.400(2)               |
| N2–C3         | 1.360                | 1.288                | 1.314                | 1.308(2)               |
| N3–C5         | 1.292                | 1.283                | 1.343                | 1.328(2)               |
| Torsion angle | <b>6a</b> Calculated | <b>6b</b> Calculated | <b>6c</b> Calculated | <b>6c</b> Experimental |
| C1–N1–C19–C20 | -55.1                | 1.5                  | -16.2                | -44.1(3)               |
| C1–C2–C5–C6   | 143.1                | 71.1                 | 177.5                | -176.97(16)            |
| C2–C5–C6–C7   | 127.8                | 120.8                | 111.8                | 113.9(2)               |
| C1–C2–C5–N3   | -37.0                | -112.4               | -4.6                 | 0.0(3)                 |
| C2–C5–N3–C12  | 170.8                | 175.2                | 173.9                | 174.18(17)             |
| C5–N3–C12–C13 | 130.2                | -55.6                | 131.4                | 144.01(19)             |
